# Supplementary material for: Extended Release Combination Antibiotic Therapy from a Bone Void Filling Putty for Treatment of Osteomyelitis
Source: MDPI journal article supplement (doi:10.3390/pharmaceutics11110592), 2019-11-08
Supplement: s1 [file s1]

# Supplementary Materials: Extended Release Combination Antibiotic Therapy from a Bone Void Filling Putty for Treatment of Osteomyelitis

Raquib Hasan, Kambri Schaner, Meredith Schroeder, Abbey Wohlers, Jacob Shreffler, Codi Schaper, Hariharaputhiran Subramanian and Amanda Brooks

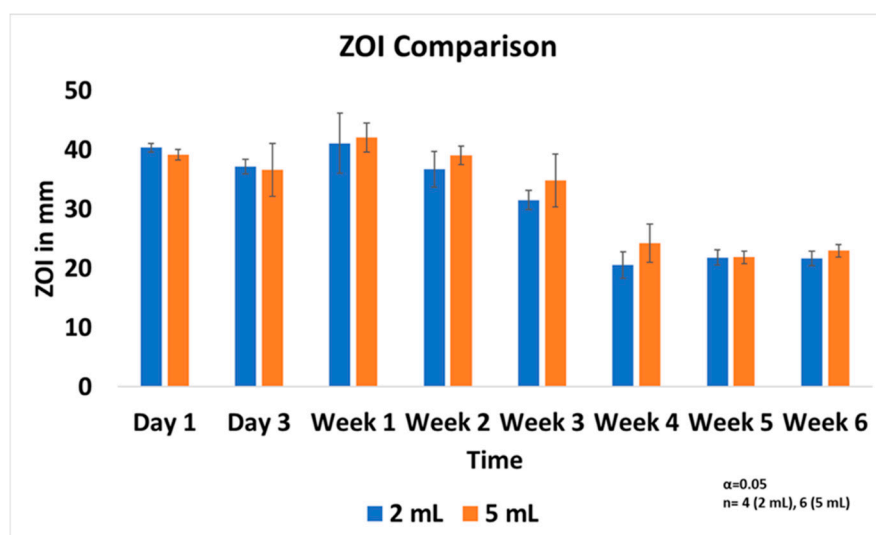

**Figure S1.** The zone of inhibition study done with released drug in 2 mL and 5 mL release media showed similar antibacterial activity against *S. aureus* (ATCC 49230). This may indicate that changes in release media volume did not alter the drug release from ABVF and that sink condition was maintained.

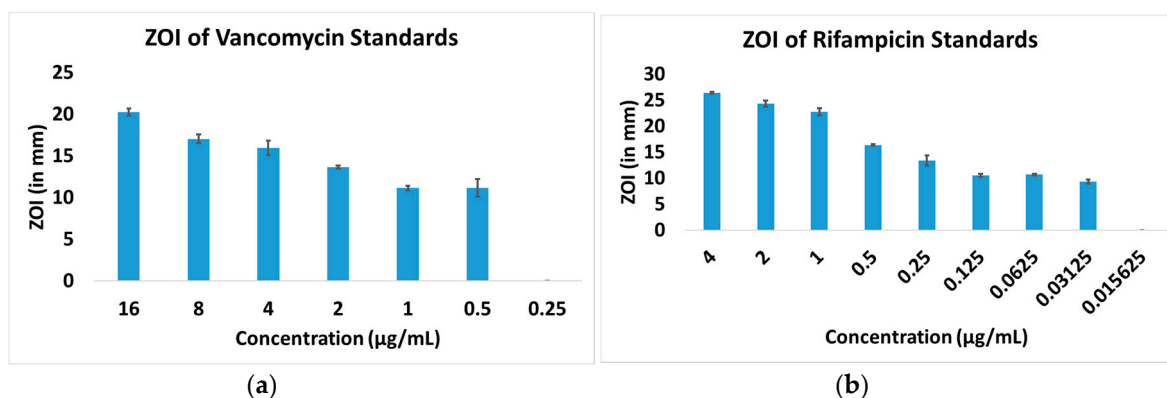

**Figure S2.** The zone of inhibition study was done with (a) vancomycin and (b) rifampicin standards to see activity against *S. aureus* (ATCC 49230). For vancomycin, concentration of  $\geq 0.5$  μg/mL showed ZOI indicating antibacterial activity. For rifampicin, concentration of  $\geq 0.031$  μg/mL showed ZOI indicating antibacterial activity.

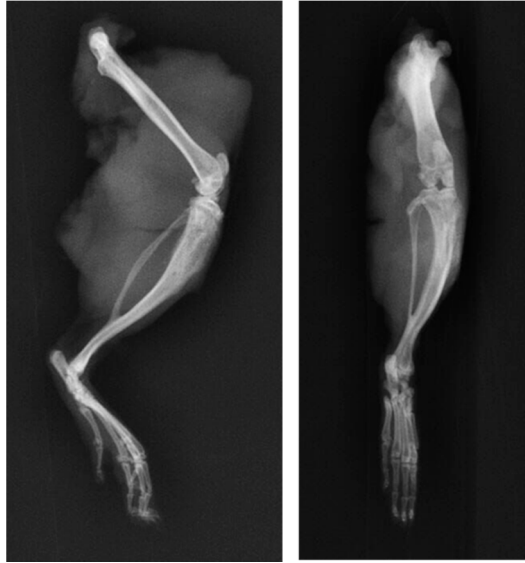

**Figure 3.** The X-ray images of cohort 1 rat tibia (control group rat in drill-hole model). Bone with osteomyelitis is visible.
